1 **Herpes simplex virus entry by a non-conventional endocytic**  
2 **pathway**

3  
4 **Giulia Tebaldi, Suzanne M. Pritchard, and Anthony V. Nicola<sup>1</sup>**

5 Department of Veterinary Microbiology and Pathology, College of Veterinary Medicine,

6 Washington State University, Pullman, WA, USA

7

8 Running title: HSV ENTRY AND Rab GTPases

9

10

11 <sup>1</sup>Correspondence: [anthony.nicola@wsu.edu](mailto:anthony.nicola@wsu.edu)

12

13

14

15

16

17

18

19

20

21

22

23

24

25

26

27

28

29

30

31

32

33

34

35

36

37

38

39

40 **ABSTRACT**

41  
42 Herpes simplex virus 1 (HSV-1) causes significant morbidity and mortality in humans  
43 worldwide. HSV-1 enters epithelial cells via an endocytosis mechanism that is low pH-  
44 dependent. However, the precise intracellular pathway has not been identified, including the  
45 compartment where fusion occurs. In this study, we utilized a combination of molecular and  
46 pharmacological approaches to better characterize HSV entry by endocytosis. HSV-1 entry was  
47 unaltered in both cells treated with siRNA to Rab5 or Rab7 and cells expressing dominant-  
48 negative forms of these GTPases, suggesting entry is independent of the conventional endo-  
49 lysosomal network. The fungal metabolite brefeldin A (BFA) and the quinoline compound  
50 Golgicide A (GCA) inhibited HSV-1 entry via beta-galactosidase reporter assay and impaired  
51 incoming virus transport to the nuclear periphery, suggesting a role for trans Golgi network  
52 (TGN) functions and retrograde transport in HSV entry. Silencing of Rab9 or Rab11 GTPases,  
53 which are involved in the retrograde transport pathway, resulted in only a slight reduction in  
54 HSV infection. Together these results suggest that HSV enters host cells by an intracellular route  
55 independent of the lysosome-terminal endocytic pathway.

56

57

58

59

60

61

62

63

64 **IMPORTANCE**

65 HSV-1, the prototype alphaherpesvirus, is ubiquitous in the human population and causes  
66 lifelong infection that can be fatal in neonatal and immunocompromised individuals. HSV enters  
67 many cell types by endocytosis, including epithelial cells, the site of primary infection in the  
68 host. The intracellular itinerary for HSV entry remains unclear. We probed the potential  
69 involvement of several Rab GTPases in HSV-1 entry, and suggest that endocytic entry of HSV-1  
70 is independent of the canonical lysosome-terminal pathway. A non-traditional endocytic route  
71 may be employed, such as one that intersects with the TGN. These results may lead to novel  
72 targets for intervention.

73

74 **KEYWORDS**

75 herpes simplex virus 1, viral entry, Rab GTPases, endocytosis, TGN, retrograde transport.

76

77

78

79

80

81

82

83

84

85

86

87

88

89

90

91

92

## 93 INTRODUCTION

94 Herpes simplex viruses (HSVs) are ubiquitous human pathogens that cause lifelong latent  
95 infections and significant morbidity and mortality all around the world. In immunocompetent  
96 patients HSV can cause cold sores and genital infections. Serious outcomes include blindness  
97 and fatal neonatal infections. In immune-compromised persons, HSV infects diverse organ  
98 systems including the respiratory and gastrointestinal tracts and the central nervous system (1-3).  
99 HSV-1 is internalized by endocytosis into epithelial cells, the site of lytic replication, by a  
100 multistep process that requires low pH. HSV enters some cells, including human neurons, by a  
101 pH-independent penetration at the plasma membrane (4-9). HSV entry is quite rapid.  
102 Immediately after infection, enveloped viral particles are detected in smooth-walled vesicles  
103 adjacent to the host cell plasma membrane (10). Treatment of cells with either hypertonic (0.3 M  
104 sucrose) medium or with medium that inhibits host cell ATP synthesis specifically blocks both  
105 receptor-mediated endocytosis and HSV entry into CHO-receptor and epithelial cells (4).  
106 Importantly, these treatments do not interfere with non-endocytic entry into cells that support  
107 fusion of herpesvirions with the cell surface (4, 11, 12). The enveloped virion traffics through the  
108 host cell vesicular system until it arrives in a compartment of the appropriate low pH, triggering  
109 membrane fusion and penetration of the capsid into the cytosol (9, 13, 14). Macropinocytosis-  
110 like and phagocytosis-like processes have been implicated (4-6, 10, 15-18). However, the precise  
111 intra-vesicular route taken and its regulation remains unclear.

112 Most animal viruses enter cells by endocytosis, and endosomal low pH is the most  
113 common cellular trigger of enveloped virus fusion (19). Inhibitors of vesicle acidification block  
114 HSV entry at an early, post-binding step (4, 10). Endosomes are the first acidic compartments in

115 the endocytic pathway (20). Vesicular pH gradually decreases from 6.2 to approximately 5.0 as  
116 cargo moves from the early endosome (EE) to the late endosome (LE) and finally to the  
117 lysosome (9, 10, 21). The endo-lysosomal system represents a complex and highly dynamic  
118 network of interacting and interconnected compartments, which are critical for host cell  
119 homeostasis (22). This lysosome-terminal endocytic pathway is a very common route for viruses  
120 entering cells via endocytosis (23-26). When cells either lack a required cellular gD-binding  
121 receptor for entry or the virus itself is entry-defective, HSV-1 is degraded, presumably in  
122 lysosomes (4, 10, 27). We theorized that HSV transits the common lysosome-terminal endocytic  
123 pathway during viral entry.

124 Endocytic trafficking is finely regulated by a large family of small Rab GTPase enzymes.  
125 Rab (Ras-related protein in brain) (28) proteins are master regulators of intracellular vesicle  
126 transport events, including vesicle formation, actin- and tubulin-dependent vesicle movement,  
127 and the interconnection of endosomal and autophagy pathways (29-32). Many pathogens hijack  
128 Rab GTPase functions upon invasion (28, 33-36). Rab proteins are involved in several stages of  
129 the viral replication cycle, including entry via endocytosis, viral assembly and egress, and viral  
130 glycoprotein trafficking (37). Rab5 is located at the cytoplasmic surface of the plasma membrane  
131 and on early endosomes. Thus, it is involved in the formation of clathrin-coated vesicles (CCVs),  
132 selectively regulating the transport of newly endocytosed vesicles from the plasma membrane to  
133 early endosomes. Rab5 mediates the homotypic fusion between early endosomes (38-40). Rab7  
134 is a late endosome-/lysosome-associated small GTPase, the only lysosomal Rab protein  
135 identified to date. It regulates the transport from EE to LE and LE to lysosomes. Rab7 also plays  
136 an important role in autophagy (41-45). Rab9 is located on the late endosome, and it mediates  
137 late endosome-to-trans-Golgi network transport (46, 47). Rab11 is associated with the trans-

138 Golgi network (TGN), post-Golgi vesicles, and recycling compartments. It regulates transport  
139 along the recycling pathway, from recycling endosomes to the cell surface, and the retrograde  
140 transport from the perinuclear endocytic recycling compartment (ERC) to the TGN (41, 48-51).

141 Here, a combination of molecular and pharmacological approaches was used to better  
142 characterize the mechanism of HSV-1 entry, including the intracellular pathway of incoming  
143 HSV. Specifically, we used siRNAs and dominant-negative mutants to investigate the  
144 involvement of Rab GTPases in HSV-1 endocytosis. Neither Rab5 nor Rab7 played a major role  
145 in HSV-1 endosomal trafficking. Rab9 and Rab11 may play a slight role. Inhibitor results  
146 suggest that retrograde transport and TGN function may play important roles during HSV entry  
147 by endocytosis.

148

## 149 **RESULTS AND DISCUSSION**

### 150 **Knockdown of Rab5 or Rab7 does not inhibit HSV infectivity**

151 HSV enters cells by an endocytic pathway that is incompletely characterized. Rab GTPases are  
152 central to the conventional lysosome-terminal endocytosis pathway that is utilized by a multitude  
153 of cargoes, including entering viruses. Rab5 selectively regulates the transport of newly  
154 endocytosed cargo from the plasma membrane to the EE. Rab7 is critical for EE to LE traffic  
155 (39, 42). Chinese hamster ovary (CHO) cells expressing a gD-receptor such as herpesvirus entry  
156 mediator (HVEM), are well-characterized model cell types for HSV entry by endocytosis (10,  
157 52, 53). CHO-HVEM cells were transfected with siRNA sequences targeting Rab5 or Rab7, or  
158 with a scrambled siRNA sequence. Downregulation was verified by Western blot analysis (Fig.  
159 1A). As determined by densitometry, host Rab5 and Rab7 were reduced by 60 and 93%,  
160 respectively. Rab downregulation was further confirmed by microscopic analysis of fluorescent

161 transferrin or LysoTracker in siRNA transfected cells. Knockdown of Rab5 or Rab7 altered the  
162 subcellular distribution of transferrin and LysoTracker in CHO-HVEM cells (Fig. 2A-B).

163 First, the effect of siRNAs was tested on the entry of a control virus, vesicular stomatitis  
164 virus (VSV). Endocytic entry of VSV is Rab5-dependent and has also been reported as Rab7-  
165 independent (37, 54). The siRNA-transfected cells were infected with VSV Indiana strain for 6  
166 hr (MOI of 0.5). Infectivity was quantitated by indirect immunofluorescence microscopy. As  
167 expected, VSV infection of CHO-HVEM cells was inhibited by siRNA to Rab5 (Fig. 1B).  
168 Conversely, VSV infection was not significantly inhibited by siRNA to Rab7 (Fig. 1B). These  
169 results validate the transfection protocol for down-regulating the production of target proteins in  
170 CHO-HVEM cells. Down-regulation of Rab5 resulted in inhibition of infection by a virus that  
171 traverses a Rab-5-dependent entry pathway. To address whether HSV entry requires the  
172 conventional, lysosome-terminal endosomal pathway, Rab5 or Rab7 was knocked down in  
173 CHO-HVEM cells and HSV KOS infectivity at 6 hr p.i. was quantitated. Neither Rab5 nor Rab7  
174 silencing resulted in a significant decrease in HSV-1 infection (Fig. 1C).

175 To assess further the roles of Rab5 and Rab7 in HSV entry and infection, CHO-HVEM  
176 cells were stably transfected with dominant-negative (DN) Rab5 S34N or Rab7 T22N. As  
177 expected, VSV infection of Rab5 S34N-expressing cells was reduced relative to control cells,  
178 while infection of Rab7 T22N-expressing cells was less affected (Fig. 1D). HSV-1 entry into  
179 CHO-HVEM cells, as measured by the reporter assay, was not inhibited by the expression of DN  
180 forms of Rab5 or Rab7 (Fig. 1E). Together, the results in Figure 1 suggest that Rab5 and Rab7  
181 GTPases do not play a major role in HSV entry and that virus-cell fusion may occur in an  
182 intracellular compartment that is distinct from the conventional endosomal route. The majority of  
183 viruses that enter cells via endocytosis use the lysosome-terminal endocytic pathway; however,

184 several viruses have evolved different and sophisticated mechanisms to hijack other aspects of  
185 the host endocytic network (23). Lymphocytic choriomeningitis (LCMV) enters cells via LE  
186 bypassing the EE (55). Mouse polyomavirus (PyV) travels from the EE to the recycling  
187 endosome and then to the ER (56). Papillomavirus takes a retrograde transport pathway to the  
188 TGN (57-59).

189

### 190 **Inhibitors of TGN function impair HSV entry**

191 To probe further the involvement of mildly acidic compartments in HSV entry, in the context of  
192 a non-conventional vesicular pathway, we utilized pharmacologic inhibitors of the trans-Golgi  
193 network, which has a pH of ~ 6 (60, 61). The pH of the CHO cell TGN is 5.95 (62), which is  
194 consistent with the pH that induces conformational change in HSV-1 gB (13, 63-66). Brefeldin A  
195 (BFA) is a small hydrophobic compound produced by toxic fungi (67). It triggers the absorption  
196 of the cis/medial/trans portion of the Golgi apparatus (68) into the ER through inhibition of the  
197 cis-Golgi ArfGEF (guanine nucleotide exchange factor) (GBF1). GBF1 is responsible for  
198 maintaining Golgi structure and enabling anterograde and retrograde traffic through the Golgi  
199 and TGN (69). BFA's effects are not limited to the Golgi. BFA also promotes the tubulation of  
200 early endosomes, the lysosome and TGN (67) whose components redistribute with the recycling  
201 endosomal system (67, 70, 71). Golgicide A (GCA) is a potent and highly specific inhibitor of  
202 GBF1. Inhibition of GBF1 function arrests the retrograde transport of Shiga toxin from EE/RE to  
203 the TGN (69, 72).

204 The effect of BFA and GCA on HSV-1 entry was measured by a beta-galactosidase  
205 reporter assay. CHO-HVEM cells harbor the *lacZ* gene under an HSV-inducible promoter. BFA  
206 and GCA inhibited HSV-1 entry into CHO-HVEM cells in a concentration-dependent manner by



207 as much as 46% and 79%, respectively (Fig. 3A, B). To extend these results, we investigated the  
208 role of the TGN in delivery of incoming HSV-1 K26GFP capsids to the nucleus during entry  
209 (Fig. 3C). In HSV-infected CHO-HVEM cells, the bulk of the GFP signal is detected at or near  
210 the nucleus by 2.5 h p.i (Fig. 3C). In the continued presence of BFA or GCA, GFP-tagged  
211 capsids were not effectively transported to the nuclear periphery (Fig. 3C). Instead, the bulk of  
212 GFP-tagged viral particles appeared to be trapped at sites distinct from the nucleus. These results  
213 were obtained in the presence of the protein synthesis inhibitor cycloheximide to ensure that GFP  
214 signal was from input virions only. This also suggests that newly synthesized viral factors do not  
215 affect the TGN-dependence of entry. Together, the results suggest that the TGN and the  
216 retrograde transport pathway play an important role during HSV entry by endocytosis.  
217 Nonenveloped viruses such as simian virus 40 (SV40), human polyomaviruses (73), adeno-  
218 associated virus (74, 75), and human papillomavirus (HPV) (57-59), take advantage of the  
219 retrograde transport route during entry. HPV entry is inhibited by BFA at a post-fusion step (76).  
220 The possibility remains that BFA inhibits a post-fusion step in HSV entry as well.

221

### 222 **Role of Rab9 and Rab11 in HSV-1 entry**

223 Since retrograde transport and/or the TGN play a potential role in endocytic entry of HSV, we  
224 investigated Rab GTPases that control retrograde transport to the TGN. Rab9 mediates  
225 retrograde transport from the late endosome to the TGN (46, 47), and Rab11 controls retrograde  
226 transport from early/recycling endosomes-to-TGN (EE/RE-to-TGN) (50, 72). Other viruses take  
227 advantage of the recycling (45, 77) and TGN (57, 78) compartments. To test the roles of Rab9 or  
228 Rab11 in HSV entry, CHO-HVEM cells were treated with appropriate siRNAs. Knockdown of  
229 Rab9 or Rab11 was confirmed by Western blot (Fig. 4A). As determined by densitometry, Rab9

230 and Rab11 were reduced by 75 and 83%, respectively. As further confirmation, in Rab9 or  
231 Rab11-depleted cells, fluorescently labelled LysoTracker or transferrin, respectively was  
232 detected in enlarged vesicles relative to control cells (Fig. 2A-B). HSV-1 KOS was added to  
233 cells (MOI of 3) and infectivity was measured by indirect immunofluorescence at 6 hr p.i. (Fig.  
234 4B). Silencing of Rab9 or Rab11 resulted in a slight decrease in HSV-1 infectivity (Fig. 4B).  
235 Under the conditions tested, the results suggest that these host cell proteins may play a small role  
236 in HSV entry. There is also likely significant entry that occurs independent of Rab9 and Rab11  
237 functions. A TGN role in HSV entry that is independent of these Rab GTPases is also possible.

238 A small molecule inhibitor was tested to probe further the role of retrograde trafficking in  
239 HSV entry. Retro-2 blocks retrograde traffic from EE to the TGN, and consequently inhibits  
240 cytosolic uptake of Shiga and ricin toxins (58, 79-82). Micromolar concentrations of retro-2  
241 inhibits entry of human papillomavirus 16, BK virus, JC virus, and SV40, and transduction by  
242 adeno-associated virus serotype 2, all of which rely on retrograde transport mechanisms (58, 73,  
243 75). Retro-2 treatment of CHO-HVEM cells had no inhibitory effect on HSV-1 entry as  
244 measured by the beta-galactosidase reporter assay (Fig. 5A). As a control for retro-2 activity, the  
245 effect on plaque formation was assessed. Retro 2.1, a derivative of retro-2, inhibits HSV-2  
246 plaque formation on Vero cells, likely at the stage of assembly or egress (83). Retro-2 was  
247 effective at inhibiting HSV-1 infectivity as measured by plaque formation (Fig. 5B), suggesting  
248 that retro-2 can exhibit inhibitory activity in our hands. Retro-2 inhibits the wrapping and egress  
249 of vaccinia virus particles, suggesting that the retrograde pathway is important for these steps of  
250 the vaccinia replication cycle (84). HSV entry is insensitive to retro-2 yet sensitive to inhibition  
251 by both BFA and GCA. This suggests that HSV entry is distinct from Shiga toxin trafficking,  
252 although it may share overlapping features.

253           The retrograde transport system is complex and selective. It relies on numerous tethering  
254 factors, small GTPases, and SNARES (85, 86). Other Rab proteins like Rab 6a, Rab 6IP, Rab 30  
255 and the Rab 7b isoform mediate retrograde traffic from the endocytic compartment to the TGN  
256 (59, 87). The overlapping and varied functions of distinct isoforms of the same Rab protein (88)  
257 reflects the complexity of processes in which these proteins are involved (28, 89, 90). Notably,  
258 retrograde trafficking occurs from different endocytic compartments (EE, RE, LE) to the TGN  
259 and to the Golgi apparatus. There is a rapidly expanding network of proteins and processes  
260 involved in this interplay (91). The retromer, a conserved cytoplasmic protein complex, plays a  
261 central role in retrograde transport from endosome-to-Golgi, as well as from endosome-to-  
262 plasma membrane (57, 92, 93). HPV16 directly exploits the retromer at the early or late  
263 endosome and traffics to the TGN/Golgi via the retrograde pathway during cell entry (58). In  
264 contrast to HSV-1 (Fig. 5A), HPV16 entry is blocked by retro-2 in a concentration-dependent  
265 manner.

266           Overall this study suggests that HSV-1 entry by endocytosis is independent of the Rab  
267 GTPases that govern the conventional EE to LE to lysosome pathway. TGN function might be  
268 involved during HSV-1 low pH endocytosis entry in epithelial cells. It will be important to  
269 confirm the present results in more physiologically relevant cell types such as primary human  
270 keratinocytes. GCA, which blocks retrograde trafficking to the TGN, reduced HSV-1 infection  
271 of CHO-receptor cells by ~ 79%. Further research is necessary to define the GCA- and BFA-  
272 sensitive nature of HSV entry. Importantly, alternate endocytic entry pathways may also  
273 function, even in the same cell type. The results reported here provide context for further  
274 characterization of HSV-1 entry by endocytosis and set the stage for identification of the  
275 intracellular site of membrane fusion.

276

## 277 **MATERIALS AND METHODS**

### 278 **Cells**

279 CHO-HVEM (M1A) cells (94), provided by R. Eisenberg and G. Cohen, University of  
280 Pennsylvania, are stably transformed with the human HVEM (or HveA) gene and contain the  
281 *Escherichia coli lacZ* gene under the control of the HSV-1 ICP4 gene promoter. CHO-HVEM  
282 cells were propagated in Ham's F12 nutrient mixture (Gibco/Life Technologies) supplemented  
283 with 10% FBS, 150 µg of puromycin (Sigma-Aldrich, St. Louis, MO, USA)/ml, and 250 µg of  
284 G418 sulfate (Thermo Fisher Scientific, Fair Lawn, NJ, USA)/ml. Cells were sub-cultured in  
285 nonselective medium prior to use in all experiments. Vero cells (American Type Culture  
286 Collection, Manassas, VA) were propagated in Dulbecco's modified Eagle's medium (DMEM)  
287 (ThermoFisher Scientific, Grand Island, NY) supplemented with 10% fetal bovine serum  
288 (Atlanta Biologicals, Atlanta, GA), respectively. Baby hamster kidney (BHK) cells were  
289 propagated in DMEM high nutrient mixture (Gibco/Life Technologies) supplemented with 5%  
290 fetal bovine serum.

291

### 292 **Viruses**

293 HSV-1 strain KOS (95) (provided by Priscilla Schaffer, Harvard Medical School) was  
294 propagated and titered on Vero cells. Vesicular stomatitis virus (VSV) Indiana strain, provided  
295 by Douglas Lyles, Wake Forest University, was titered on BHK cells and CHO-HVEM cells.  
296 HSV-1 KOS K26 GFP contains green fluorescent protein (GFP) fused to the N-terminus of the  
297 VP26 capsid protein (96) (provided by Prashant Desai, Johns Hopkins University). It was  
298 propagated and titrated on Vero cells.

299

### 300 **Transient transfection**

301 CHO-HVEM cells were grown in 24-well plates to 70% confluence. Culture medium was  
302 removed, and the cells were transfected with siCtrl (sc-37007), siRab5A (sc-36344), siRab7A  
303 (sc-29460), siRab9A (sc-41831) or siRab11A (sc-36341) (Santa Cruz Biotechnology) using  
304 Lipo3000 transfection reagent (Thermo Fisher). Briefly, 60 pmol of siRNA was mixed with 1.5  
305  $\mu$ l Lipo3000 in 50  $\mu$ l of serum-free OPTIMEM (Gibco Life Technologies) for 15 min at room  
306 temperature. Serum-free OPTIMEM medium was added to a final volume of 250  $\mu$ l, and the  
307 transfection reaction was added to cells for 5 h at 37°C. The transfection mixture was replaced  
308 with medium supplemented with 10% FBS, and cultures were incubated for 24 or 48 h at 37°C.

309

### 310 **SDS-PAGE and Western blotting**

311 At 24 or 48 h post-transfection, protein cell extracts were prepared by RIPA lysis buffer (50 mM  
312 Tris-HCl, EDTA 2 mM, 150 mM NaCl, and 1% NP-40; pH 8) supplemented with cOmplete,  
313 Mini, EDTA-free Protease Inhibitor Cocktail (Roche). Total protein concentration was calculated  
314 with the BCA Protein Assay Kit (Pierce). Cell lysates were separated by SDS-PAGE on 4-20%  
315 Tris-glycine gels (Novex). Following transfer to nitrocellulose by electroblotting, membranes  
316 were blocked and incubated with antibodies to  $\alpha$ -Tubulin (Sigma T9026), Rab5 (Abcam  
317 ab18211), Rab7 (Abcam ab137029), Rab9 (Invitrogen MA3-067), or Rab11 (Invitrogen 71-  
318 5300). Secondary antibody conjugated with horseradish peroxidase (Sigma) was added, followed  
319 by enhanced chemiluminescence substrate (SuperSignal West Dura Extended Duration, Thermo  
320 Scientific).

321

322 **HSV infectivity measured by immunofluorescence microscopy**

323 At 24 or 48 h post-transfection, HSV-1 KOS (MOI of 3) or VSV (MOI of 0.5) was added to cell  
324 monolayers grown on glass coverslips in 24-well culture dishes. At 6 h p.i., cultures were  
325 washed with PBS, fixed in ice-cold methanol and blocked with 1% BSA in PBS. Anti-ICP4  
326 MAb H1A021 or monoclonal Ab to VSV glycoprotein G (P5D4, Sigma) was added for 1 h  
327 followed by Alexa Fluor 488-labeled goat anti-mouse IgG (Invitrogen) for 30 min. Nuclei were  
328 counterstained with 5 ng/ml of DAPI. Coverslips were mounted on slides with Fluoromount G  
329 and visualized with a Leica DMI8 Fluorescence microscope at 10X magnification. Cells were  
330 counted with ImageJ. Three independent experiments were performed with three replicates per  
331 experiment.

332

333 **Cells transfected with dominant-negative Rab GTPase plasmids**

334 Dominant-negative Rab5 (S34N) or Rab7 (T22N) or mock plasmids expressing the sequence of  
335 interest and Turbo RFP (Red Fluorescent Protein) gene under control of elongation factor, and  
336 the hygromycin-resistance gene under control of a mouse phosphoglycerate kinase 1 promoter  
337 were synthesized and sequenced by VectorBuilder (Chicago, Illinois). CHO-HVEM cells in a 25  
338 cm<sup>2</sup> flask were grown to 70% confluence and transfected with 7.5 µg of DNA using the  
339 Lipofectamine 3000 Transfection Kit (Invitrogen) according to the manufacturer's instructions.  
340 At 5 h post-transfection, the transfection mixture was replaced with complete F12 medium. At 24  
341 h post-transfection, medium was replaced with complete F12 supplemented with 500 µg/ml  
342 Hygromycin B (Invitrogen). When cells in a control untransfected flask were killed by  
343 Hygromycin B (~72 h), the transfected cells were subcultured in selection medium. The stably  
344 transfected cells were passaged > 6 times under constant selection prior to use in viral entry  
345 experiments. For experiments, transfected or mock-transfected CHO-HVEM cells in

346 Hygromycin B were plated and kept under Hygromycin selection until attachment. Following  
347 cell attachment, selective medium was removed and replaced with complete medium for 24 h.

348

#### 349 **VSV plaque assay**

350 Transfected cells in Hygromycin B were added to 6-well plates. Following cell attachment,  
351 selective medium was removed and replaced with complete medium. After 24 h, VSV was added  
352 and titered by limiting dilution. At 1 h p.i., the inoculum was removed and replaced with warm 2  
353 ml 2% carboxymethyl cellulose in F12 medium with 2% FBS (CMC). At 48 h p.i., 2 ml of 10%  
354 formalin was layered onto the CMC for 2 h at room temperature. The overlay was removed, and  
355 fixed cells were washed with water. Crystal violet was added for 30 min at room temperature.  
356 Cells were rinsed with water. Plaques were visualized with a Leica stereoscope.

357

#### 358 **Beta-galactosidase reporter assay of HSV-1 entry**

359 HSV-1 KOS was added (MOI ~ 1) in the continued presence of drugs. At 6 hr p.i., 0.5%  
360 IGEPAL (Sigma–Aldrich) was added to lyse the cells. Chlorophenol red-beta-D-  
361 galactopyranoside (Roche Diagnostics, Indianapolis, IN) substrate was added to cell lysates, and  
362 the beta-galactosidase activity was read at 595 nm with an ELx808 microtiter plate reader  
363 (BioTek Instruments, Winooski, VT, United States). Beta-galactosidase activity indicates  
364 successful viral entry (97).

365

#### 366 **Transferrin and LysoTracker uptake assays**

367 CHO-HVEM cells were grown in 24-well plates to 70% confluence and then transfected with  
368 siRab5A, siRab7A, siRab9A, or siRab11A as described above. For transferrin uptake, at 24 h

369 post-transfection, cultures were washed twice and replenished with serum-free F12 medium for  
370 80 min total at 37°C replacing the medium every 40 min. Cultures were incubated on ice at 4°C  
371 for 40 min. Transferrin Texas Red Conjugate (100 µg/ml) (Invitrogen T2875) was added to the  
372 wells for 50 min at 4°C. Cells were washed to remove unbound transferrin, and then serum-  
373 containing F12 medium was added at 37°C for 10 min. For LysoTracker uptake, at 24 h post-  
374 transfection, 100 nM LysoTracker Red DND-99 (Invitrogen L7528) in complete F12 medium  
375 was added for 30 min at 37°C. Cultures were washed twice with PBS and fixed with 3%  
376 paraformaldehyde–PBS at 37°C for 10 min. Fixed cells were washed twice with PBS, quenched  
377 with 50 mM NH<sub>4</sub>Cl at room temperature for 10 min, and then permeabilized with 0.1% Triton X-  
378 100 in PBS for 10 min. Nuclei were counterstained with 5 ng/ml of 4,6–diamidino-2-  
379 phenylindole dihydrochloride (DAPI; Roche). Coverslips were mounted on slides with  
380 Fluoromount G (Electron Microscopy Sciences, Hatfield, PA) and visualized with a Leica DMi8  
381 fluorescence microscope at 100X magnification.

382

### 383 **Effect of Golgi inhibitors on HSV-1 entry**

384 Confluent cell monolayers grown in 96-well plates were pretreated with a range of  
385 concentrations of brefeldin A (BFA, EMD Millipore CAS 20350-15-6) or Golgicide A (GCA,  
386 EMD Millipore CAS 1139889-93-2) for 20 min or with retro-2 (Sigma CAS 1429192-00-6) for 4  
387 h at 37°C. Control samples were treated with vehicle DMSO. HSV-1 KOS was added and  
388 method for beta-galactosidase reporter assay was followed.

389

### 390 **Subcellular localization of entering GFP-tagged HSV**



391 Sub-confluent CHO-HVEM cell monolayers grown on coverslips in 24-well plates were treated  
392 with 2 µg/ml BFA, 10 µM GCA or 50 mM NH<sub>4</sub>Cl in the presence of 0.5 mM cycloheximide for  
393 20 min at 37°C. HSV-1 K26GFP (MOI of 100) was added for 2.5 h in the continued presence of  
394 agents. Cultures were washed twice with PBS and fixed with 3% paraformaldehyde–PBS at  
395 37°C for 10 min. Fixed cells were washed twice with PBS, quenched with 50 mM NH<sub>4</sub>Cl at  
396 room temperature for 10 min, and then permeabilized with 0.1% Triton X-100 in PBS for 10  
397 min. Nuclei were counterstained with 5 ng/ml of 4,6–diamidino-2-phenylindole dihydrochloride  
398 (DAPI; Roche). Coverslips were mounted on slides with Fluoromount G (Electron Microscopy  
399 Sciences, Hatfield, PA) and visualized with a Leica DMI8 fluorescence microscope at 100X  
400 magnification.

401

#### 402 **HSV plaque assay**

403 CHO-HVEM cells in 24 well plates were pre-treated with 50 µM Retro-2 (Sigma) for 4 h at  
404 37°C. HSV-1 KOS (~100 PFU/well) was added in the continued presence of drug. At 24 h p.i.,  
405 cells were fixed with ice-cold methanol and acetone (2:1 ratio) for 20 min at –20°C and air-dried  
406 and assayed for HSV plaque formation. Cells were stained with rabbit polyclonal antibody to  
407 HSV, HR50 (Fitzgerald Industries, Concord, MA), washed thrice with PBS and incubated with  
408 1:200 dilution of goat anti-rabbit IgG conjugated with horseradish peroxidase (Thermo Fisher  
409 Scientific) for 1 h at room temperature. Following three washes with PBS, 4-chloro-1-naphtol  
410 (Sigma) substrate was added and plaques were visualized with a Leica stereoscope.

411

#### 412 **Statistical analysis**

413 Student's t-test with one tail distribution was used for infectivity experiments. Data are shown as  
414 geometric means with errors bars representing  $\pm$  s.e.m. Significance is indicated as \*P<0.05,  
415 \*\*P<0.00005.

416

## 417 **ACKNOWLEDGMENTS**

418 This work was supported by Public Health Service grant AI119159 (A.V.N.) from the National  
419 Institute of Allergy and Infectious Diseases. We thank Gary Cohen, Roselyn Eisenberg, Douglas  
420 Lyles, and Priscilla Schaffer for generous gifts of reagents. We thank Massaro Ueti for the use of  
421 the fluorescence microscope and members of the Nicola laboratory for helpful discussions and  
422 suggestions.

423

## 424 **REFERENCES**

425

- 426 1. **Roizman B, Knipe, DM., Whitley, RJ.** 2013. Herpes simplex viruses, 6th ed. Lippincott  
427 Williams & Wilkins,.
- 428 2. **Kennedy PG, Steiner I.** 2013. Recent issues in herpes simplex encephalitis. *J Neurovirol*  
429 **19**:346-350.
- 430 3. **Liesegang TJ.** 2001. Herpes simplex virus epidemiology and ocular importance. *Cornea*  
431 **20**:1-13.
- 432 4. **Nicola AV, McEvoy AM, Straus SE.** 2003. Roles for endocytosis and low pH in herpes  
433 simplex virus entry into HeLa and Chinese hamster ovary cells. *Journal of virology*  
434 **77**:5324-5332.
- 435 5. **Nicola AV, Hou J, Major EO, Straus SE.** 2005. Herpes simplex virus type 1 enters human  
436 epidermal keratinocytes, but not neurons, via a pH-dependent endocytic pathway. *J*  
437 *Virology* **79**:7609-7616.
- 438 6. **Sayers CL, Elliott G.** 2016. Herpes Simplex Virus 1 Enters Human Keratinocytes by a  
439 Nectin-1-Dependent, Rapid Plasma Membrane Fusion Pathway That Functions at Low  
440 Temperature. *J Virol* **90**:10379-10389.
- 441 7. **Lycke E, Hamark B, Johansson M, Krotochwil A, Lycke J, Svennerholm B.** 1988. Herpes  
442 simplex virus infection of the human sensory neuron. An electron microscopy study.  
443 *Arch Virol* **101**:87-104.
- 444 8. **Koyama AH, Uchida T.** 1989. The effect of ammonium chloride on the multiplication of  
445 herpes simplex virus type 1 in Vero cells. *Virus Res* **13**:271-281.

- 446 9. **Nicola AV.** 2016. Herpesvirus Entry into Host Cells Mediated by Endosomal Low pH.  
447 *Traffic* **17**:965-975.
- 448 10. **Nicola AV, Straus SE.** 2004. Cellular and viral requirements for rapid endocytic entry of  
449 herpes simplex virus. *Journal of virology* **78**:7508-7517.
- 450 11. **Pastenkos G, Lee B, Pritchard SM, Nicola AV.** 2018. Bovine Herpesvirus 1 Entry by a  
451 Low-pH Endosomal Pathway. *J Virol* **92**.
- 452 12. **Miller JL, Weed DJ, Lee BH, Pritchard SM, Nicola AV.** 2019. Low-pH Endocytic Entry of  
453 the Porcine Alphaherpesvirus Pseudorabies Virus. *J Virol* **93**.
- 454 13. **Dollery SJ, Delboy MG, Nicola AV.** 2010. Low pH-induced conformational change in  
455 herpes simplex virus glycoprotein B. *J Virol* **84**:3759-3766.
- 456 14. **Weed DJ, Nicola AV.** 2017. Herpes simplex virus Membrane Fusion. *Adv Anat Embryol*  
457 *Cell Biol* **223**:29-47.
- 458 15. **Devadas D, Koithan T, Diestel R, Prank U, Sodeik B, Dohner K.** 2014. Herpes simplex  
459 virus internalization into epithelial cells requires Na<sup>+</sup>/H<sup>+</sup> exchangers and p21-activated  
460 kinases but neither clathrin- nor caveolin-mediated endocytosis. *J Virol* **88**:13378-13395.
- 461 16. **Clement C, Tiwari V, Scanlan PM, Valyi-Nagy T, Yue BYJT, Shukla D.** 2006. A novel role  
462 for phagocytosis-like uptake in herpes simplex virus entry. *The Journal of cell biology*  
463 **174**:1009-1021.
- 464 17. **Petermann P, Haase I, Knebel-Morsdorf D.** 2009. Impact of Rac1 and Cdc42 signaling  
465 during early herpes simplex virus type 1 infection of keratinocytes. *J Virol* **83**:9759-9772.
- 466 18. **Rahn E, Petermann P, Hsu MJ, Rixon FJ, Knebel-Morsdorf D.** 2011. Entry pathways of  
467 herpes simplex virus type 1 into human keratinocytes are dynamin- and cholesterol-  
468 dependent. *PloS one* **6**:e25464.
- 469 19. **Nicola AV, Aguilar HC, Mercer J, Ryckman B, Wiethoff CM.** 2013. Virus entry by  
470 endocytosis. *Adv Virol* **2013**:469538.
- 471 20. **Fuchs R, Ellinger, A., Pavelka, M., Peterlik, M., and Mellman, I.** 1987. Endocytic coated  
472 vesicles do not exhibit ATP-dependent acidification in vitro. *J Cell Biol* **105**.
- 473 21. **Klumperman J, Raposo G.** 2014. The complex ultrastructure of the endolysosomal  
474 system. *Cold Spring Harbor perspectives in biology* **6**:a016857-a016857.
- 475 22. **van Weering JRT, Verkade P, Cullen PJ.** 2012. SNX-BAR-Mediated Endosome Tubulation  
476 is Co-ordinated with Endosome Maturation. *Traffic* **13**:94-107.
- 477 23. **Cossart P, Helenius A.** 2014. Endocytosis of viruses and bacteria. *Cold Spring Harb*  
478 *Perspect Biol* **6**.
- 479 24. **Yamauchi Y, Helenius A.** 2013. Virus entry at a glance. *J Cell Sci* **126**:1289-1295.
- 480 25. **Staring J, Raaben M, Brummelkamp TR.** 2018. Viral escape from endosomes and host  
481 detection at a glance. *J Cell Sci* **131**.
- 482 26. **Lozach PY, Huotari J, Helenius A.** 2011. Late-penetrating viruses. *Curr Opin Virol* **1**:35-  
483 43.
- 484 27. **Campadelli-Fiume G, Arsenakis M, Farabegoli F, Roizman B.** 1988. Entry of herpes  
485 simplex virus 1 in BJ cells that constitutively express viral glycoprotein D is by  
486 endocytosis and results in degradation of the virus. *J Virol* **62**:159-167.
- 487 28. **Pylypenko O, Hammich H, Yu IM, Houdusse A.** 2018. Rab GTPases and their interacting  
488 protein partners: Structural insights into Rab functional diversity. *Small GTPases* **9**:22-  
489 48.

- 490 29. **Ao X, Zou L, Wu Y.** 2014. Regulation of autophagy by the Rab GTPase network. *Cell*  
491 *Death Differ* **21**:348-358.
- 492 30. **Hutagalung AH, Novick PJ.** 2011. Role of Rab GTPases in membrane traffic and cell  
493 physiology. *Physiol Rev* **91**:119-149.
- 494 31. **Stenmark H, Olkkonen VM.** 2001. The Rab GTPase family. *Genome Biol* **2**:REVIEWS3007.
- 495 32. **Elgner F, Hildt E, Bender D.** 2018. Relevance of Rab Proteins for the Life Cycle of  
496 Hepatitis C Virus. *Front Cell Dev Biol* **6**:166.
- 497 33. **De Franceschi N, Hamidi H, Alanko J, Sahgal P, Ivaska J.** 2015. Integrin traffic - the  
498 update. *J Cell Sci* **128**:839-852.
- 499 34. **Militello R, Colombo MI.** 2013. Small GTPases as regulators of cell division. *Commun*  
500 *Integr Biol* **6**:e25460.
- 501 35. **Numrich J, Ungermann C.** 2014. Endocytic Rabs in membrane trafficking and signaling.  
502 *Biol Chem* **395**:327-333.
- 503 36. **van Ijzendoorn SC, Mostov KE, Hoekstra D.** 2003. Role of rab proteins in epithelial  
504 membrane traffic. *Int Rev Cytol* **232**:59-88.
- 505 37. **Spearman P.** 2018. Viral interactions with host cell Rab GTPases. *Small GTPases* **9**:192-  
506 201.
- 507 38. **Gorvel JP, Chavrier P, Zerial M, Gruenberg J.** 1991. rab5 controls early endosome fusion  
508 in vitro. *Cell* **64**:915-925.
- 509 39. **Bucci C, Parton RG, Mather IH, Stunnenberg H, Simons K, Hoflack B, Zerial M.** 1992.  
510 The small GTPase rab5 functions as a regulatory factor in the early endocytic pathway.  
511 *Cell* **70**:715-728.
- 512 40. **McLauchlan H, Newell J, Morrice N, Osborne A, West M, Smythe E.** 1998. A novel role  
513 for Rab5-GDI in ligand sequestration into clathrin-coated pits. *Curr Biol* **8**:34-45.
- 514 41. **Feng Y, Press B, Wandinger-Ness A.** 1995. Rab 7: an important regulator of late  
515 endocytic membrane traffic. *J Cell Biol* **131**:1435-1452.
- 516 42. **Vitelli R, Santillo M, Lattero D, Chiariello M, Bifulco M, Bruni CB, Bucci C.** 1997. Role of  
517 the small GTPase Rab7 in the late endocytic pathway. *J Biol Chem* **272**:4391-4397.
- 518 43. **Gutierrez MG, Munafo DB, Beron W, Colombo MI.** 2004. Rab7 is required for the  
519 normal progression of the autophagic pathway in mammalian cells. *J Cell Sci* **117**:2687-  
520 2697.
- 521 44. **Jager S, Bucci C, Tanida I, Ueno T, Kominami E, Saftig P, Eskelinen EL.** 2004. Role for  
522 Rab7 in maturation of late autophagic vacuoles. *J Cell Sci* **117**:4837-4848.
- 523 45. **Liu C-C, Zhang Y-N, Li Z-Y, Hou J-X, Zhou J, Kan L, Zhou B, Chen P-Y.** 2017. Rab5 and  
524 Rab11 Are Required for Clathrin-Dependent Endocytosis of Japanese Encephalitis Virus  
525 in BHK-21 Cells. *Journal of virology* **91**:e01113-01117.
- 526 46. **Lombardi D, Soldati T, Riederer MA, Goda Y, Zerial M, Pfeffer SR.** 1993. Rab9 functions  
527 in transport between late endosomes and the trans Golgi network. *EMBO J* **12**:677-682.
- 528 47. **Dintzis SM, Pfeffer SR.** 1990. The mannose 6-phosphate receptor cytoplasmic domain is  
529 not sufficient to alter the cellular distribution of a chimeric EGF receptor. *EMBO J* **9**:77-  
530 84.
- 531 48. **Zhang Y-N, Liu Y-Y, Xiao F-C, Liu C-C, Liang X-D, Chen J, Zhou J, Baloch AS, Kan L, Zhou**  
532 **B, Qiu H-J.** 2018. Rab5, Rab7, and Rab11 Are Required for Caveola-Dependent

- 533 Endocytosis of Classical Swine Fever Virus in Porcine Alveolar Macrophages. *Journal of*  
534 *virology* **92**:e00797-00718.
- 535 49. **Ullrich O, Reinsch S, Urbe S, Zerial M, Parton RG.** 1996. Rab11 regulates recycling  
536 through the pericentriolar recycling endosome. *J Cell Biol* **135**:913-924.
- 537 50. **Wilcke M, Johannes L, Galli T, Mayau V, Goud B, Salamero J.** 2000. Rab11 regulates the  
538 compartmentalization of early endosomes required for efficient transport from early  
539 endosomes to the trans-golgi network. *J Cell Biol* **151**:1207-1220.
- 540 51. **Welz T, Wellbourne-Wood J, Kerkhoff E.** 2014. Orchestration of cell surface proteins by  
541 Rab11. *Trends Cell Biol* **24**:407-415.
- 542 52. **Gianni T, Campadelli-Fiume G, Menotti L.** 2004. Entry of herpes simplex virus mediated  
543 by chimeric forms of nectin1 retargeted to endosomes or to lipid rafts occurs through  
544 acidic endosomes. *J Virol* **78**:12268-12276.
- 545 53. **Campadelli-Fiume G, Cocchi F, Menotti L, Lopez M.** 2000. The novel receptors that  
546 mediate the entry of herpes simplex viruses and animal alphaherpesviruses into cells.  
547 *Rev Med Virol* **10**:305-319.
- 548 54. **Sieczkarski SB, Whittaker GR.** 2003. Differential requirements of Rab5 and Rab7 for  
549 endocytosis of influenza and other enveloped viruses. *Traffic* **4**:333-343.
- 550 55. **Quirin K, Eschli B, Scheu I, Poort L, Kartenbeck J, Helenius A.** 2008. Lymphocytic  
551 choriomeningitis virus uses a novel endocytic pathway for infectious entry via late  
552 endosomes. *Virology* **378**:21-33.
- 553 56. **Liebl D, Difato F, Hornikova L, Mannova P, Stokrova J, Forstova J.** 2006. Mouse  
554 polyomavirus enters early endosomes, requires their acidic pH for productive infection,  
555 and meets transferrin cargo in Rab11-positive endosomes. *J Virol* **80**:4610-4622.
- 556 57. **DiMaio D, Burd CG, Goodner K.** 2015. Riding the R Train into the Cell. *PLoS Pathog*  
557 **11**:e1005036.
- 558 58. **Lipovsky A, Popa A, Pimienta G, Wyler M, Bhan A, Kuruvilla L, Guie MA, Poffenberger**  
559 **AC, Nelson CD, Atwood WJ, DiMaio D.** 2013. Genome-wide siRNA screen identifies the  
560 retromer as a cellular entry factor for human papillomavirus. *Proc Natl Acad Sci U S A*  
561 **110**:7452-7457.
- 562 59. **Sapp MJ.** 2013. HPV virions hitchhike a ride on retromer complexes. *Proc Natl Acad Sci*  
563 *U S A* **110**:7116-7117.
- 564 60. **Casey JR, Grinstein S, Orlowski J.** 2010. Sensors and regulators of intracellular pH. *Nat*  
565 *Rev Mol Cell Biol* **11**:50-61.
- 566 61. **Paroutis P, Touret N, Grinstein S.** 2004. The pH of the secretory pathway:  
567 measurement, determinants, and regulation. *Physiology (Bethesda)* **19**:207-215.
- 568 62. **Demaurex N, Furuya W, D'Souza S, Bonifacino JS, Grinstein S.** 1998. Mechanism of  
569 acidification of the trans-Golgi network (TGN). In situ measurements of pH using  
570 retrieval of TGN38 and furin from the cell surface. *J Biol Chem* **273**:2044-2051.
- 571 63. **Dollery SJ, Wright CC, Johnson DC, Nicola AV.** 2011. Low-pH-dependent changes in the  
572 conformation and oligomeric state of the prefusion form of herpes simplex virus  
573 glycoprotein B are separable from fusion activity. *J Virol* **85**:9964-9973.
- 574 64. **Siekavizza-Robles CR, Dollery SJ, Nicola AV.** 2010. Reversible conformational change in  
575 herpes simplex virus glycoprotein B with fusion-from-without activity is triggered by  
576 mildly acidic pH. *Virol J* **7**:352.

- 577 65. **Weed DJ, Pritchard SM, Gonzalez F, Aguilar HC, Nicola AV.** 2017. Mildly Acidic pH  
578 Triggers an Irreversible Conformational Change in the Fusion Domain of Herpes Simplex  
579 Virus 1 Glycoprotein B and Inactivation of Viral Entry. *J Virol* **91**.
- 580 66. **Weed DJ, Dollery SJ, Komala Sari T, Nicola AV.** 2018. Acidic pH Mediates Changes in  
581 Antigenic and Oligomeric Conformation of Herpes Simplex Virus gB and Is a Determinant  
582 of Cell-Specific Entry. *J Virol* **92**.
- 583 67. **Lippincott-Schwartz J, Yuan L, Tipper C, Amherdt M, Orci L, Klausner RD.** 1991.  
584 Brefeldin A's effects on endosomes, lysosomes, and the TGN suggest a general  
585 mechanism for regulating organelle structure and membrane traffic. *Cell* **67**:601-616.
- 586 68. **Huang S, Wang Y.** 2017. Golgi structure formation, function, and post-translational  
587 modifications in mammalian cells. *F1000Res* **6**:2050.
- 588 69. **Saenz JB, Sun WJ, Chang JW, Li J, Bursulaya B, Gray NS, Haslam DB.** 2009. Golgicide A  
589 reveals essential roles for GBF1 in Golgi assembly and function. *Nat Chem Biol* **5**:157-  
590 165.
- 591 70. **Klausner RD, Donaldson JG, Lippincott-Schwartz J.** 1992. Brefeldin A: insights into the  
592 control of membrane traffic and organelle structure. *J Cell Biol* **116**:1071-1080.
- 593 71. **Lippincott-Schwartz J, Yuan LC, Bonifacino JS, Klausner RD.** 1989. Rapid redistribution  
594 of Golgi proteins into the ER in cells treated with brefeldin A: evidence for membrane  
595 cycling from Golgi to ER. *Cell* **56**:801-813.
- 596 72. **Mallard F, Tang BL, Galli T, Tenza D, Saint-Pol A, Yue X, Antony C, Hong W, Goud B,  
597 Johannes L.** 2002. Early/recycling endosomes-to-TGN transport involves two SNARE  
598 complexes and a Rab6 isoform. *J Cell Biol* **156**:653-664.
- 599 73. **Nelson CD, Carney DW, Derdowski A, Lipovsky A, Gee GV, O'Hara B, Williard P, DiMaio  
600 D, Sello JK, Atwood WJ.** 2013. A retrograde trafficking inhibitor of ricin and Shiga-like  
601 toxins inhibits infection of cells by human and monkey polyomaviruses. *mBio* **4**:e00729-  
602 00713.
- 603 74. **Bantel-Schaal U, Hub B, Kartenbeck J.** 2002. Endocytosis of adeno-associated virus type  
604 5 leads to accumulation of virus particles in the Golgi compartment. *J Virol* **76**:2340-  
605 2349.
- 606 75. **Nonnenmacher ME, Cintrat JC, Gillet D, Weber T.** 2015. Syntaxin 5-dependent  
607 retrograde transport to the trans-Golgi network is required for adeno-associated virus  
608 transduction. *J Virol* **89**:1673-1687.
- 609 76. **Laniosz V, Dabydeen SA, Havens MA, Meneses PI.** 2009. Human papillomavirus type 16  
610 infection of human keratinocytes requires clathrin and caveolin-1 and is brefeldin a  
611 sensitive. *J Virol* **83**:8221-8232.
- 612 77. **Vale-Costa S, Amorim MJ.** 2016. Recycling Endosomes and Viral Infection. *Viruses* **8**:64.
- 613 78. **Day PM, Thompson CD, Schowalter RM, Lowy DR, Schiller JT.** 2013. Identification of a  
614 role for the trans-Golgi network in human papillomavirus 16 pseudovirus infection. *J*  
615 *Virol* **87**:3862-3870.
- 616 79. **Stechmann B, Bai SK, Gobbo E, Lopez R, Merer G, Pinchard S, Panigai L, Tenza D,  
617 Raposo G, Beaumelle B, Sauvaire D, Gillet D, Johannes L, Barbier J.** 2010. Inhibition of  
618 retrograde transport protects mice from lethal ricin challenge. *Cell* **141**:231-242.
- 619 80. **Nicolas V, Lievin-Le Moal V.** 2020. Small Trafficking Inhibitor Retro-2 Disrupts the  
620 Microtubule-Dependent Trafficking of Autophagic Vacuoles. *Front Cell Dev Biol* **8**:464.



- 621 81. **Forrester A, Rathjen SJ, Daniela Garcia-Castillo M, Bachert C, Couhert A, Tepshi L,**  
622 **Pichard S, Martinez J, Munier M, Sierocki R, Renard HF, Augusto Valades-Cruz C, Dingli**  
623 **F, Loew D, Lamaze C, Cintrat JC, Linstedt AD, Gillet D, Barbier J, Johannes L.** 2020.  
624 Functional dissection of the retrograde Shiga toxin trafficking inhibitor Retro-2. *Nat*  
625 *Chem Biol* **16**:327-336.
- 626 82. **Farhan H.** 2020. Rendezvous of Retro-2 at the ER. *Nat Chem Biol* **16**:229-230.
- 627 83. **Dai W, Wu Y, Bi J, Wang J, Wang S, Kong W, Barbier J, Cintrat JC, Gao F, Jiang Z, Gillet**  
628 **D, Su W, Jiang C.** 2018. Antiviral Effect of Retro-2.1 against Herpes Simplex Virus Type 2  
629 *In Vitro*. *J Microbiol Biotechnol* **28**:849-859.
- 630 84. **Sivan G, Weisberg AS, Americo JL, Moss B.** 2016. Retrograde Transport from Early  
631 Endosomes to the trans-Golgi Network Enables Membrane Wrapping and Egress of  
632 Vaccinia Virus Virions. *J Virol* **90**:8891-8905.
- 633 85. **Bonifacino JS, Rojas R.** 2006. Retrograde transport from endosomes to the trans-Golgi  
634 network. *Nat Rev Mol Cell Biol* **7**:568-579.
- 635 86. **Schindler C, Chen Y, Pu J, Guo X, Bonifacino JS.** 2015. EARP is a multisubunit tethering  
636 complex involved in endocytic recycling. *Nat Cell Biol* **17**:639-650.
- 637 87. **Zulkefli KL.** 2017. Role of Rab11 and Rab30 in regulating the endosome-trans-Golgi  
638 network. University of Melbourne.
- 639 88. **Schwartz SL, Cao C, Pylypenko O, Rak A, Wandinger-Ness A.** 2007. Rab GTPases at a  
640 glance. *J Cell Sci* **120**:3905-3910.
- 641 89. **Pfeffer SR.** 2005. Structural clues to Rab GTPase functional diversity. *J Biol Chem*  
642 **280**:15485-15488.
- 643 90. **Diekmann Y, Seixas E, Gouw M, Tavares-Cadete F, Seabra MC, Pereira-Leal JB.** 2011.  
644 Thousands of rab GTPases for the cell biologist. *PLoS Comput Biol* **7**:e1002217.
- 645 91. **Johannes L, Popoff V.** 2008. Tracing the retrograde route in protein trafficking. *Cell*  
646 **135**:1175-1187.
- 647 92. **Lu L, Hong W.** 2014. From endosomes to the trans-Golgi network. *Semin Cell Dev Biol*  
648 **31**:30-39.
- 649 93. **Seaman MN.** 2012. The retromer complex - endosomal protein recycling and beyond. *J*  
650 *Cell Sci* **125**:4693-4702.
- 651 94. **Montgomery RI, Warner MS, Lum BJ, Spear PG.** 1996. Herpes simplex virus-1 entry into  
652 cells mediated by a novel member of the TNF/NGF receptor family. *Cell* **87**:427-436.
- 653 95. **Macdonald SJ, Mostafa HH, Morrison LA, Davido DJ.** 2012. Genome sequence of herpes  
654 simplex virus 1 strain KOS. *J Virol* **86**:6371-6372.
- 655 96. **Desai P, Person S.** 1998. Incorporation of the green fluorescent protein into the herpes  
656 simplex virus type 1 capsid. *J Virol* **72**:7563-7568.
- 657 97. **Delboy MG, Patterson JL, Hollander AM, Nicola AV.** 2006. Nectin-2-mediated entry of a  
658 syncytial strain of herpes simplex virus via pH-independent fusion with the plasma  
659 membrane of Chinese hamster ovary cells. *Virology Journal* **3**.

660  
661

## 662 **FIGURE LEGENDS**

663 **Figure 1. Role of Rab5 and Rab7 on HSV entry and infection.** (A) The knockdown efficiency  
664 of Rab5 or Rab7 was determined by Western blotting. CHO-HVEM cells (-) were transiently  
665 transfected with either control, Rab5 or Rab7 siRNAs for 24 h or 48 h. Cell lysates were reacted  
666 with anti-Rab5 or anti-Rab7 antibody specific for the indicated proteins.  $\alpha$ -Tubulin was used as  
667 an internal loading control. (B, C) CHO-HVEM cells (-) were transiently transfected with  
668 control, Rab5 or Rab7 siRNAs for 24 h or 48 h. Control, Rab5, or Rab7 siRNA-treated cells  
669 were infected with (B) VSV (MOI of 0.5) or (C) HSV (MOI of 3). At 6 h p.i., infection was  
670 detected by quantitating VSV G-positive cells or HSV ICP4-positive cells via indirect  
671 immunofluorescence microscopy. At least 500 cells per cover slip were counted. Values are the  
672 mean  $\pm$  SE of three independent experiments \* $P \leq 0.05$ . (D, E) Effect of DN forms of Rab5 or  
673 Rab7 on HSV entry. CHO-HVEM cells were stably transfected with control, Rab5 S34N or  
674 Rab7 T22N plasmids. Cells were infected with (D) VSV Indiana (120 PFU/well) or (E) HSV-1  
675 KOS (MOI 0.5-1). At 44 h p.i., VSV infectivity was measured by plaque assay. At 6 h p.i., HSV  
676 entry was measured by beta-galactosidase reporter assay. Infectivity in control cells was set to  
677 100%. Each experiment was performed in at least triplicate. Data shown are the averages  $\pm$  SE of  
678 at least two independent experiments \*\* $P \leq 0.00005$ .

679

680 **Figure 2. Effect of Rab knockdowns on the subcellular distribution of transferrin and**  
681 **LysoTracker.** CHO-HVEM cells were transfected with siRNAs specific for (A, B) Rab5, Rab7,  
682 (A) Rab11 or (B) Rab9. Downregulation of Rab5 and Rab7 was verified by Western blot (see  
683 Fig. 1). Downregulation of Rab9 and Rab11 was verified by Western blot (see Fig. 4). (A)  
684 Transferrin-Texas Red (100  $\mu$ g/ml) was bound to cells at 4°C, and then cultures were shifted to  
685 37°C for 10 min. (B) 100 nM LysoTracker Red DND-99 was added for 30 min 37°C. Cells were



686 fixed, and nuclei were counterstained with DAPI. The contrast of panels in B was adjusted  
687 equivalently with Canvas.

688

689 **Figure 3. Golgi-inhibitors brefeldin A and Golgicide A impair HSV entry.** CHO-HVEM

690 cells were pretreated for 20 min with the indicated concentrations of (A) BFA or (B) GCA.

691 HSV-1 strain KOS was added (MOI of 1) for 6 h in the constant presence of drug. Beta-

692 galactosidase activity at 595 nm is indicative of successful HSV entry. Beta-galactosidase

693 activity in the absence of drug was set to 100%. (C) CHO-HVEM cells on coverslips were

694 infected with HSV-1 K26GFP (MOI of 100) and concurrently exposed to 2 µg/ml BFA, 10 µM

695 GCA or 50 mM NH<sub>4</sub>Cl for 2.5 h. Cells were fixed, and nuclei were stained with DAPI (blue). In

696 untreated cells, the majority of incoming capsids (green) were detected at or near the nucleus. In

697 BFA, GCA, and control NH<sub>4</sub>Cl, treated cells, capsids were trapped in the cell periphery.

698

699 **Figure 4. Effects of Rab9 and Rab11 knockdown on HSV entry and infection.** (A) The

700 knockdown efficiency of Rab9 or Rab11 was determined by Western blotting. CHO-HVEM

701 cells (-) were transiently transfected with either control, Rab9 or Rab11 siRNAs for 24 h. Cell

702 lysates were reacted with anti-Rab9 or anti-Rab11 antibody specific for the indicated proteins. α-

703 Tubulin was used as an internal loading control. (B) CHO-HVEM cells (-) were transiently

704 transfected with control, Rab9 or Rab11 siRNAs for 24 h. Control, Rab9, or Rab11 siRNA-

705 treated cells were infected with HSV (MOI of 3). At 6 h p.i, infection was detected by

706 quantitating HSV ICP4-positive cells via indirect immunofluorescence microscopy. At least 500

707 cells per cover slip were counted. Values are the mean ± SE of three independent experiments

708 \*P≤0.05.

709

710 **Figure 5. Effects of Retro-2 on HSV entry and infection.** (A) CHO-HVEM cells were  
711 pretreated with the indicated concentrations of retro-2 for 4 h. HSV-1 strain KOS was added  
712 (MOI ~ 1) for 6 h in the presence of drug. Beta-galactosidase activity in the absence of drug was  
713 set to 100% entry. (B) Vero cells were pretreated for 4 h with 50  $\mu$ M retro-2. HSV-1 KOS (100  
714 PFU/well) was added for 24 h at 37°C. Plaque formation in the absence of drug was set to 100%.  
715 Each experiment was performed in quadruplicate. Data shown are the averages  $\pm$  SE of three  
716 independent experiments \* $P \leq 0.05$ .

717

718

**A**

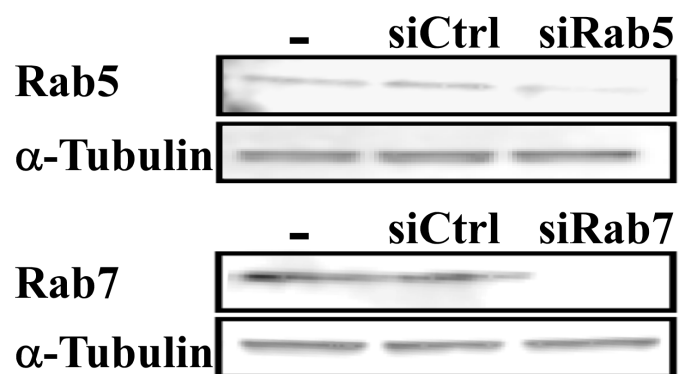

**B**

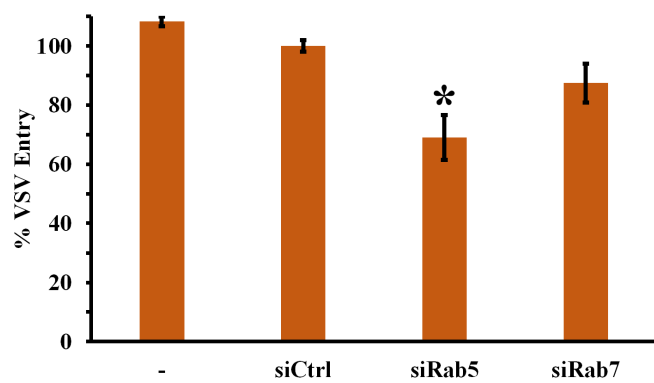

**D**

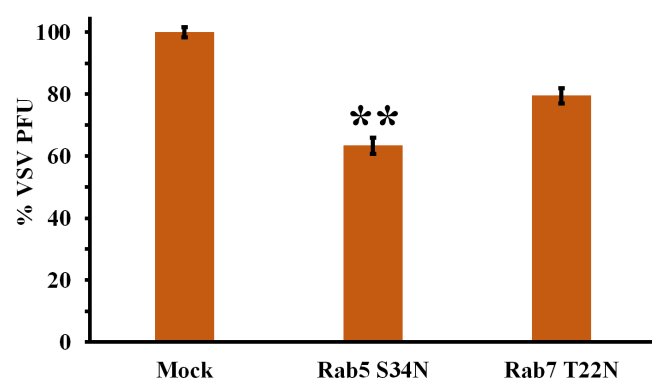

**C**

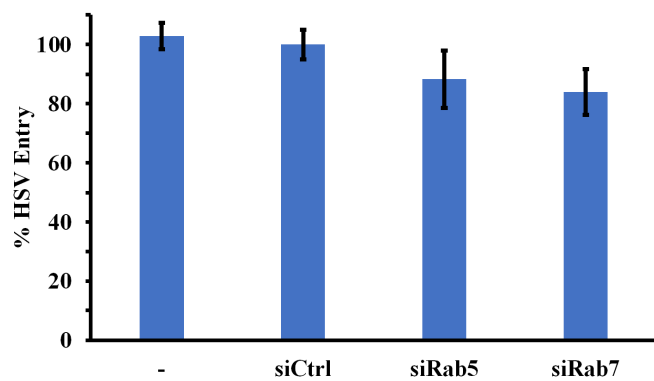

**E**

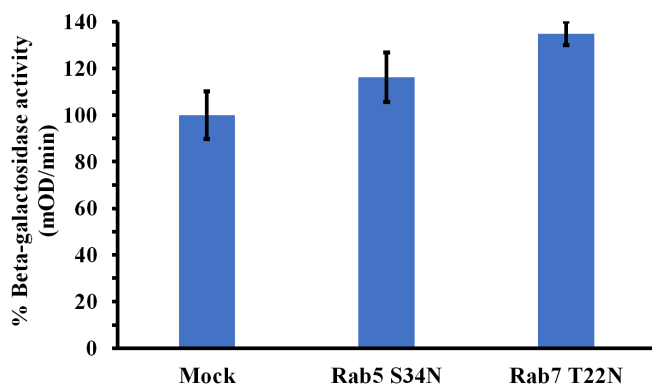

**A**

**Transferrin  
siRNA**

-

+

+

+

+

-

-

**siRab5**

**siRab7**

**siRab11**

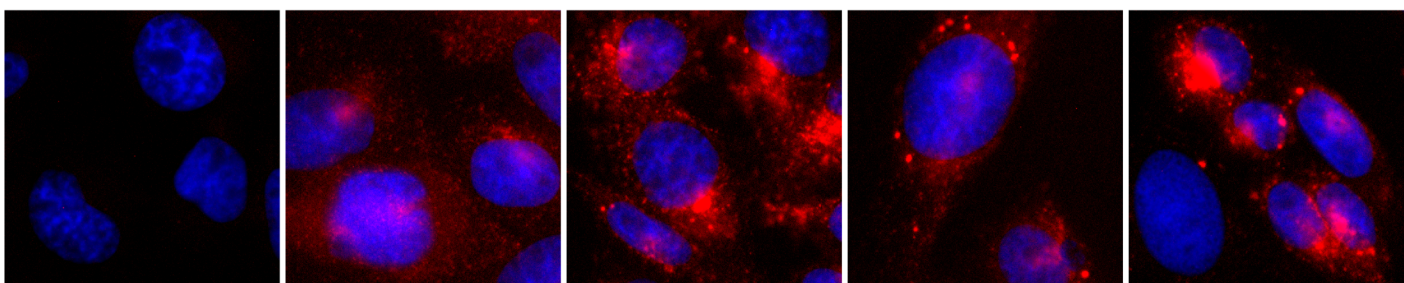

**B**

**LysoTracker  
siRNA**

-

+

+

+

+

-

-

**siRab5**

**siRab7**

**siRab9**

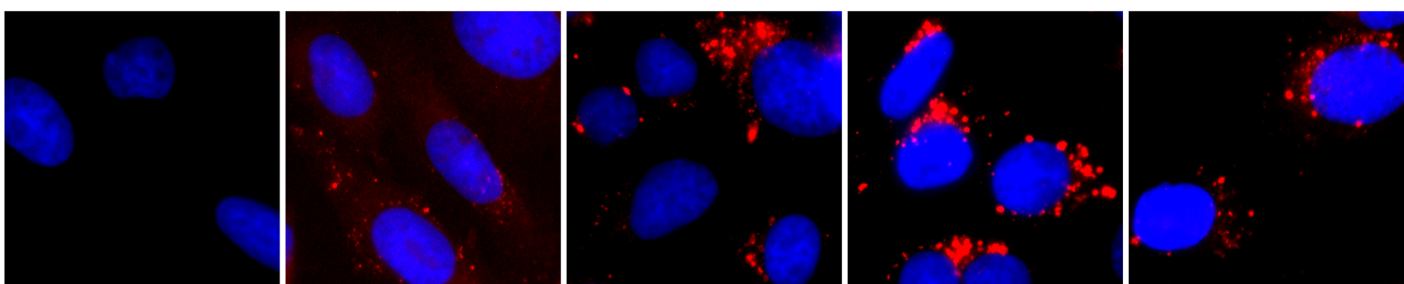

**A**

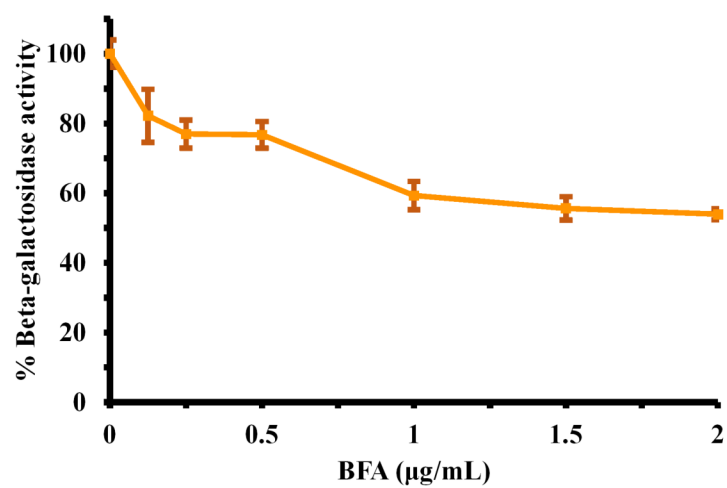

**B**

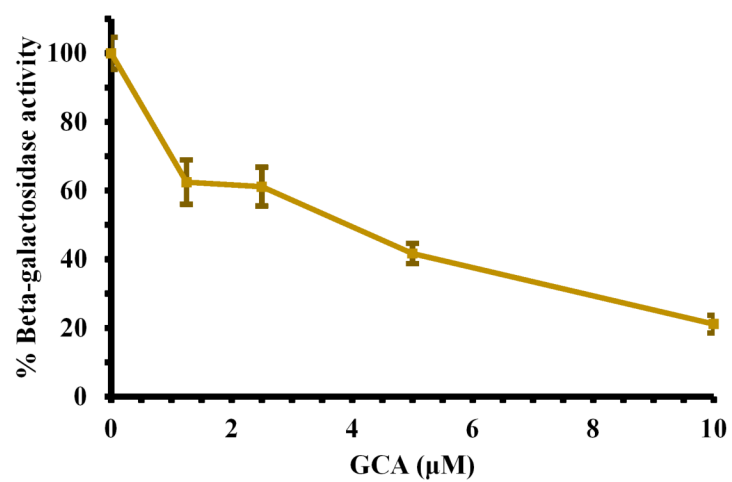

**C**

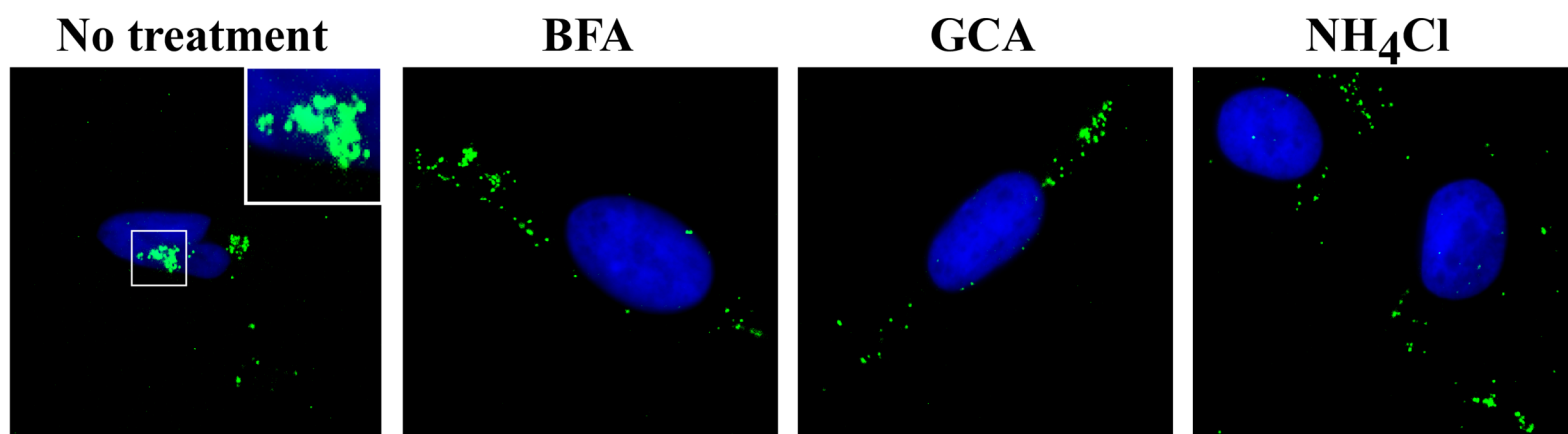

**A**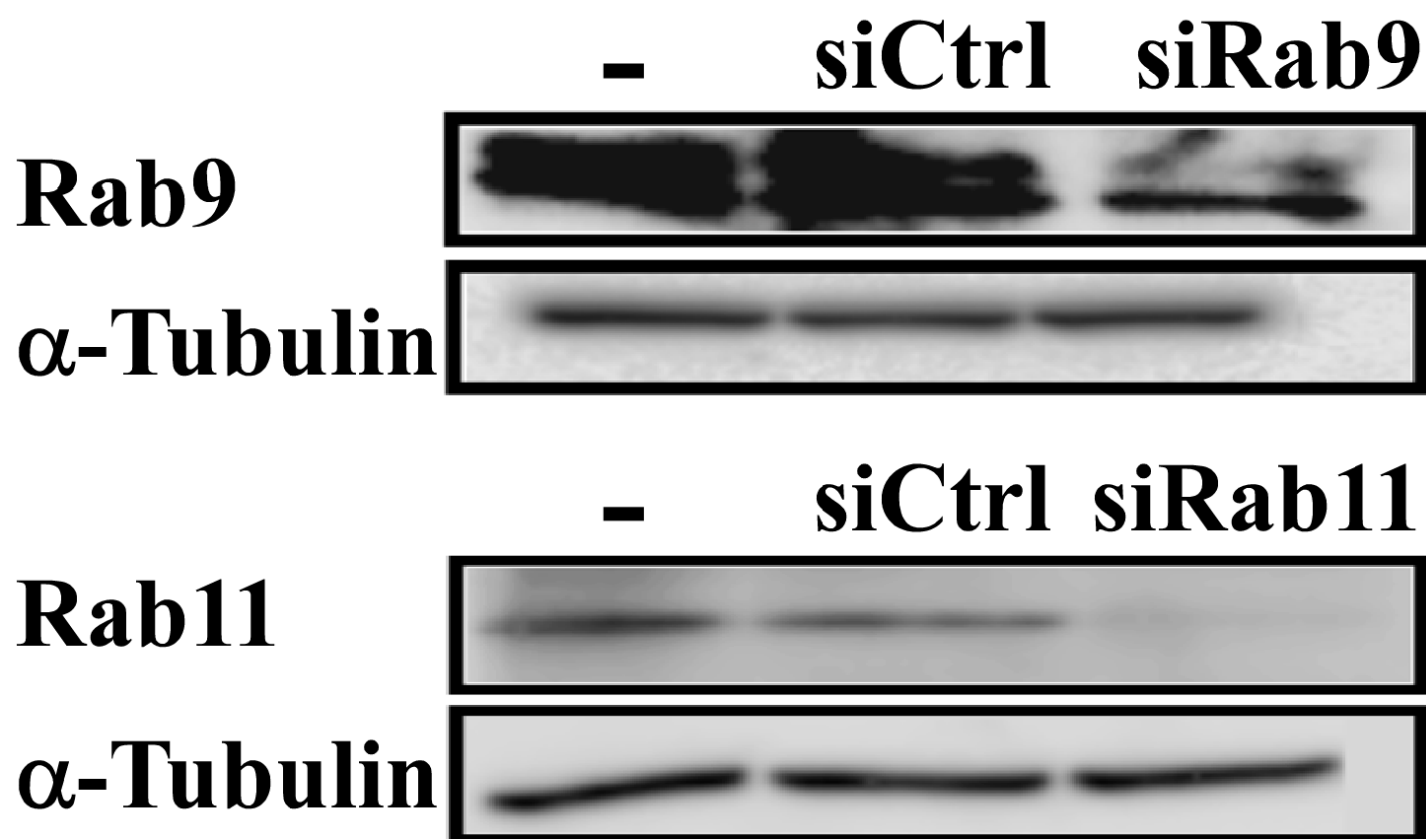**B**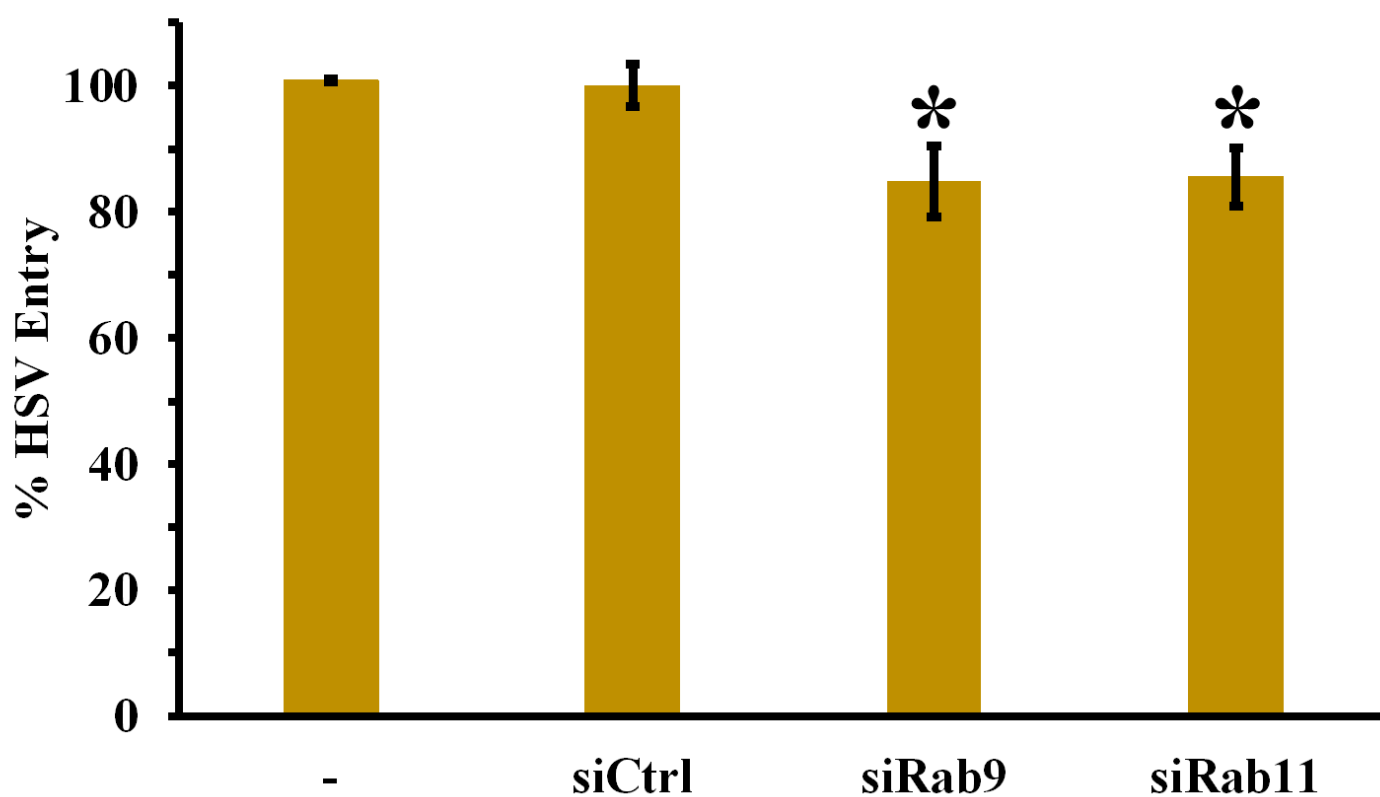

**A**

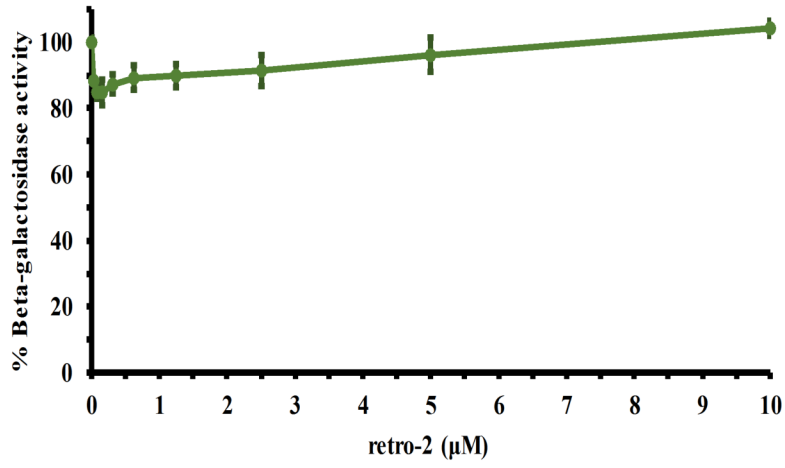

**B**

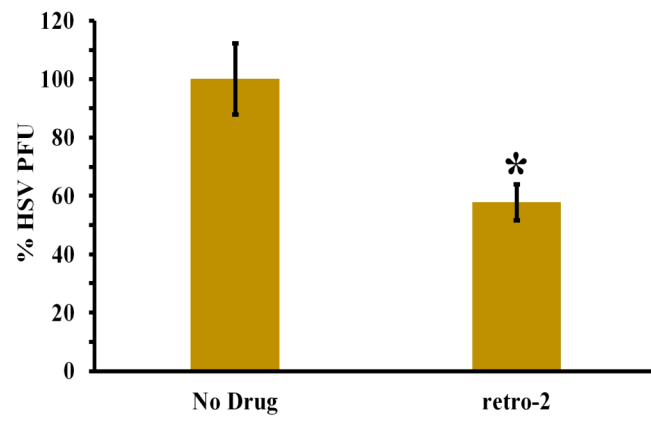

Source: https://www.biorxiv.org/content/10.1101/2020.09.28.317867v1.full.pdf
